# Supplementary material for: Postoperative Pain, an Unmet Problem in Day or Overnight Italian Surgery Patients: A Prospective Study
Source: Hindawi journal article supplement (doi:10.1155/2016/6104383), 2016-01-01
Supplement: f1 [file 6104383.f1.pdf]

## DATA COLLECTION

CC NUMBER: \_\_\_\_\_

SURGICAL INTERVENTION DATE: \_\_\_\_\_ TELEPHONE CALL DATE: \_\_\_\_\_

TYPE OF SURGICAL INTERVENTION:

\_\_\_\_\_

TYPE OF ANESTHESIA:

- ☐ Local
- ☐ Local + Sedation
- ☐ Nerve Block
- ☐ Spinal
- ☐ Narcosis
- ☐ Other \_\_\_\_\_

SEX: M F      AGE: \_\_\_\_\_

ANALGESIC THERAPY AFTER SURGERY (prescribed for the first 24 h):

- ☐ Tachidol every \_\_\_h
- ☐ Perfalgan every \_\_\_h
- ☐ Toradol every \_\_\_h
- ☐ Orudis every \_\_\_h
- ☐ Oxycontin \_\_\_mg every \_\_\_h
- ☐ Other \_\_\_\_\_

ANALGESIC THERAPY AT DISCHARGE:

- ☐ Tachidol every \_\_\_h
- ☐ Toradol if pain > 4
- ☐ Other \_\_\_\_\_

1) PAIN 6 HOURS AFTER DISCHARGE:

2) PAIN 12 HOURS AFTER DISCHARGE:

3) PAIN 24 HOURS AFTER DISCHARGE:

4) OTHER ASSUMED DRUG PAINKILLERS TO THOSE REQUIRED ON DISCHARGE LETTER:

IF YES, WHAT?

5) HAVE YOU CONTACTED ANY DOCTOR OR HEALTH SERVICE TO MANAGE PAIN?

IF YES, WHO?

## DIARY

|                                                     | Discharge |      | Day 1 |      | Day 2 |      | Day 3 |     | Day 4 |      | Day 5 |      | Day 6 |      | Day 7 |      |
|-----------------------------------------------------|-----------|------|-------|------|-------|------|-------|-----|-------|------|-------|------|-------|------|-------|------|
|                                                     | h 16      | h 22 | h 8   | h 20 | h 8   | h 20 | h 8   | h 8 | h 8   | h 20 | h 8   | h 20 | h 8   | h 20 | h 8   | h 20 |
| My pain level from 0 to 10                          |           |      |       |      |       |      |       |     |       |      |       |      |       |      |       |      |
| Did you take painkillers? (yes/no)                  |           |      |       |      |       |      |       |     |       |      |       |      |       |      |       |      |
| Did you take any other painkiller? (yes/no)         |           |      |       |      |       |      |       |     |       |      |       |      |       |      |       |      |
| Did you contact your general practitioner? (yes/no) |           |      |       |      |       |      |       |     |       |      |       |      |       |      |       |      |
| Did you contact your hospital? (yes/no)             |           |      |       |      |       |      |       |     |       |      |       |      |       |      |       |      |
| Did you go to Emergency Department? (yes/no)        |           |      |       |      |       |      |       |     |       |      |       |      |       |      |       |      |
| Other pain relief strategies (yes/no)               |           |      |       |      |       |      |       |     |       |      |       |      |       |      |       |      |

**If you have taken drugs other than prescribed, what you took?**

---

**If you have used other ways to relief pain, what they did? (Eg. Ice on the operated area, massages, natural remedies ..) They gave you relief? (Yes or no)**

---

**Was there any symptom / problem that forced you to stop painkillers? (Eg. Nausea, vomiting ...). Describe it, please.**

---
